# Supplementary material for: Serum sCD40L and IL-31 in Association with Early Phase of IgA Nephropathy
Source: MDPI journal article supplement (doi:10.3390/jcm12052023), 2023-03-03
Supplement: s1 [file s1]

**Table S1. Cytokine profiles in each group**

|               | IgAN (n = 114)         |               |                           | ADPKD (n = 10)         |               |                           | Controls (n = 5)       |               |                           |
|---------------|------------------------|---------------|---------------------------|------------------------|---------------|---------------------------|------------------------|---------------|---------------------------|
|               | Detectable samples (%) | Range (pg/mL) | Median detectable (pg/mL) | Detectable samples (%) | Range (pg/mL) | Median detectable (pg/mL) | Detectable samples (%) | Range (pg/mL) | Median detectable (pg/mL) |
| IL-1 $\beta$  | 52 (45.6)              | 1.95-12       | 4.41                      | 0                      | -             | 0.0                       | 0                      | -             | 0.0                       |
| IL-4          | 8 (7.01)               | 6.05-13.2     | 7.3                       | 0                      | -             | 0.0                       | 0                      | -             | 0.0                       |
| IL-6          | 62 (54.3)              | 5.68-33.5     | 11.6                      | 0                      | -             | 0.0                       | 0                      | -             | 0.0                       |
| IL-10         | 2 (1.75)               | 10.9-30.2     | 20.5                      | 0                      | -             | 0.0                       | 0                      | -             | 0.0                       |
| IL-17A        | 1 (0.87)               | -             | 18.8                      | 0                      | -             | 0.0                       | 0                      | -             | 0.0                       |
| IL-17F        | 5 (4.38)               | 17.0-47.7     | 23.6                      | 1 (10)                 | -             | 18.6                      | 0                      | -             | 0.0                       |
| IL-21         | 1 (0.87)               | -             | 210                       | 0                      | -             | 0.0                       | 0                      | -             | 0.0                       |
| IL-22         | 2 (1.75)               | 23.5-261      | 142                       | 0                      | -             | 0.0                       | 0                      | -             | 0.0                       |
| IL-23         | 2 (1.75)               | 151-166       | 158                       | 0                      | -             | 0.0                       | 0                      | -             | 0.0                       |
| IL-25         | 1 (0.87)               | -             | 12.1                      | 0                      | -             | 0.0                       | 0                      | -             | 0.0                       |
| IL-31         | 112 (98.2)             | 182-543       | 348                       | 0                      | -             | 0.0                       | 0                      | -             | 0.0                       |
| IL-33         | 12 (10.5)              | 25.9-55.3     | 32.6                      | 0                      | -             | 0.0                       | 0                      | -             | 0.0                       |
| IFN- $\gamma$ | 8 (7.01)               | 8.63-21.3     | 14.9                      | 0                      | -             | 0.0                       | 0                      | -             | 0.0                       |
| sCD40L        | 114 (100)              | 252-560       | 367                       | 10 (100)               | 55.4-146      | 86.9                      | 0                      | -             | 0.0                       |
| TNF- $\alpha$ | 112 (98.2)             | 16.0-53.9     | 27.9                      | 7 (70)                 | 3.64-5.66     | 4.29                      | 0                      | -             | 0.0                       |

Data are expressed as the median (interquartile) or number (percentage). ADPKD, autosomal dominant polycystic kidney disease; IgAN, IgA nephropathy; IFN, interferon; IL, interleukin; sCD40L, soluble CD40 ligand; TNF, tumor necrosis factor.

**Table S2. Multivariate-adjusted regression analysis of predictors of serum sCD40L in the cohort of IgAN and ADPKD patients and healthy controls.**

|                     | $\beta$ | P        | model R <sup>2</sup> |
|---------------------|---------|----------|----------------------|
| IgAN (vs. not IgAN) | 165     | <0.0001* | 0.24                 |

Adjusted for age and eGFR. \* $p$ <0.05.

**Multivariate-adjusted regression analysis of predictors of serum IL-31 in the cohort of IgAN and ADPKD patients and healthy controls.**

|                     | $\beta$ | P        | model R <sup>2</sup> |
|---------------------|---------|----------|----------------------|
| IgAN (vs. not IgAN) | 181     | <0.0001* | 0.23                 |

Adjusted for age and eGFR.

IgAN, IgA nephropathy; ADPKD, autosomal dominant polycystic kidney disease; eGFR, estimated glomerular filtration rate. \* $p$ <0.05.

**Table S3. Multivariate-adjusted regression analysis of predictors of eGFR in different models including serum sCD40L in IgAN**

|                              | $\beta$ | P       | model R <sup>2</sup> |
|------------------------------|---------|---------|----------------------|
| Model 1                      |         |         |                      |
| sCD40L $\geq$ median (pg/mL) | 1.68    | 0.38    | 0.45                 |
| Model 2                      |         |         |                      |
| sCD40L $\geq$ median (pg/mL) | 1.12    | 0.57    | 0.46                 |
| UPCR $\geq$ 0.5 (g/gCr)      | -2.88   | 0.14    |                      |
| Model 3                      |         |         |                      |
| sCD40L $\geq$ median (pg/mL) | -0.043  | 0.98    | 0.49                 |
| UPCR $\geq$ 0.5 (g/gCr)      | -1.86   | 0.34    |                      |
| MBP $\geq$ median (mmHg)     | -0.43   | 0.0073* |                      |

Adjusted for age. The median values of serum sCD40L is 367 (pg/mL).

eGFR, estimated glomerular filtration rate; IgAN, IgA nephropathy; MBP, mean blood pressure; sCD40L, soluble CD40 ligand; UPCR, urinary protein to creatinine ratio. \* $p < 0.05$ .

**Table S4. Multivariate-adjusted regression analysis of predictors of eGFR in different models including serum IL-31 in IgAN**

|                             | $\beta$ | P    | model R <sup>2</sup> |
|-----------------------------|---------|------|----------------------|
| Model 1                     |         |      |                      |
| IL-31 $\geq$ median (pg/mL) | 2.38    | 0.22 | 0.44                 |
| Model 2                     |         |      |                      |
| IL-31 $\geq$ median (pg/mL) | 1.91    | 0.33 | 0.45                 |
| UPCR $\geq$ 0.5 (g/gCr)     | -2.82   | 0.15 |                      |
| Model 3                     |         |      |                      |
| IL-31 $\geq$ median (pg/mL) | 1.69    | 0.39 | 0.47                 |
| UPCR $\geq$ 0.5 (g/gCr)     | -2.56   | 0.19 |                      |
| MBP $\geq$ median (mmHg)    | -2.96   | 0.13 |                      |

Adjusted for age. The median values of serum IL-31 is 348 (pg/mL).

eGFR, estimated glomerular filtration rate; IgAN, IgA nephropathy; IL-31, interleukin 31; MBP, mean blood pressure; UPCR, urinary protein to creatinine ratio.

**Figure S1.** Relationship between Gd-IgA1 and IgAN, proteinuria (UPCR), sCD40L or IL-31 in IgAN patients.

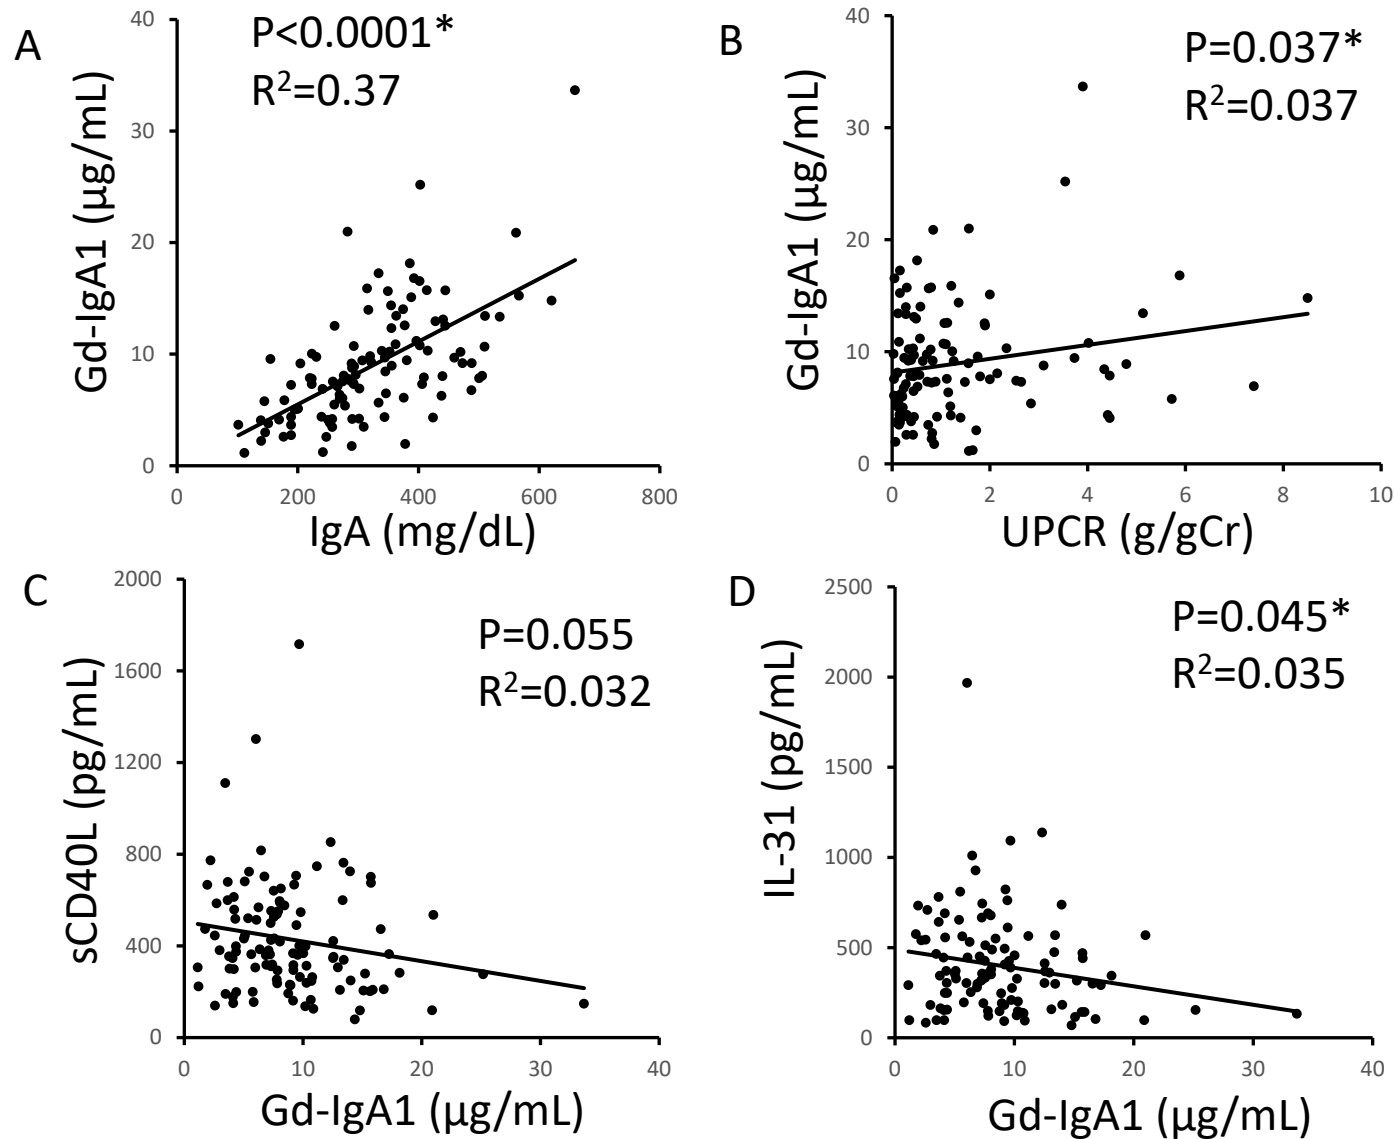

Gd-IgA1 was significantly correlated with serum IgA (A) and the UPCR (B). Gd-IgA1 was not positively correlated with serum sCD40L (C) and IL-31 (D).  $*p < 0.05$ .

**Figure S2.** Relationship between TNF- $\alpha$  and proteinuria (UPCR), the renal function (eGFR), sCD40L, IL-31 or Gd-IgA1 in IgAN patients.

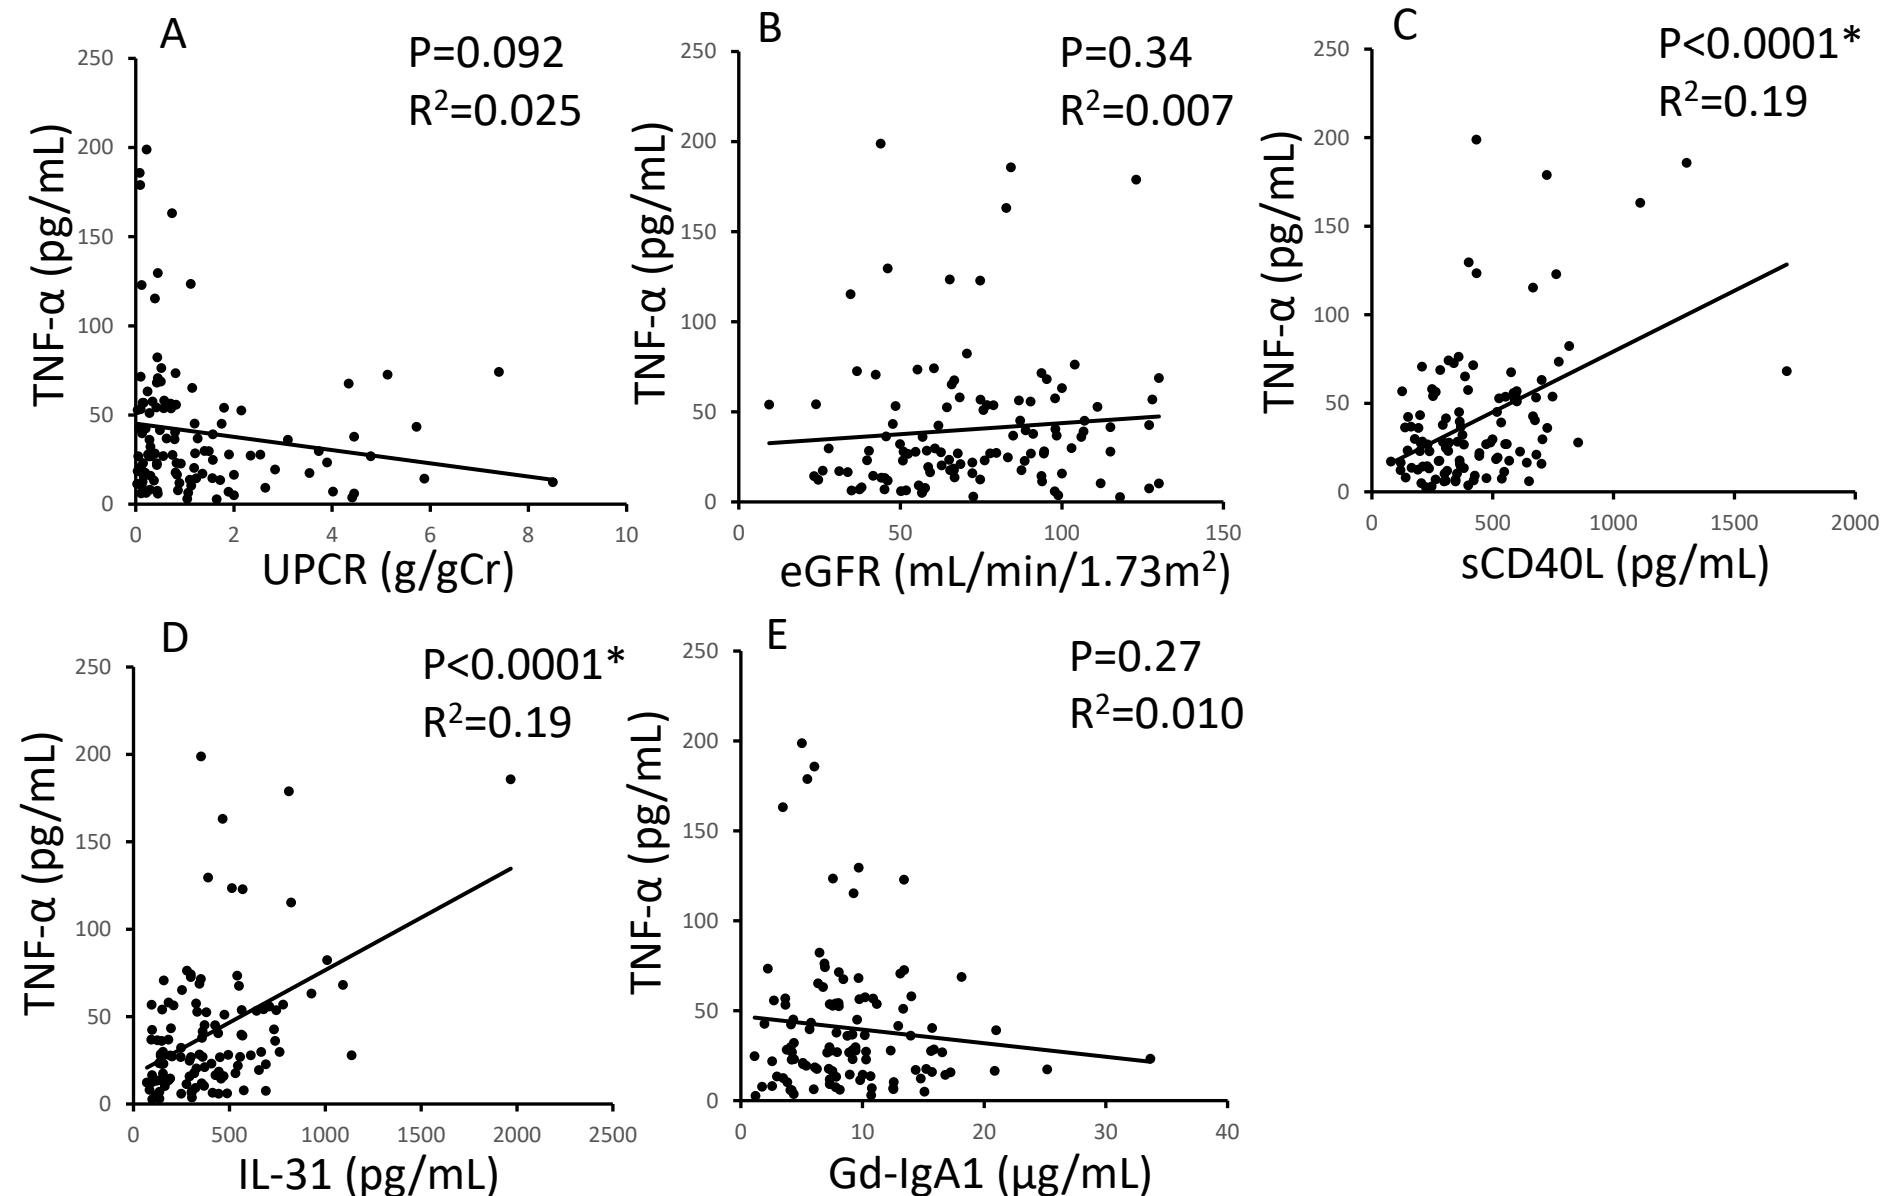

TNF- $\alpha$  was not significantly associated with the UPCR (A) or eGFR (B). TNF- $\alpha$  was significantly correlated with sCD40L (C) and IL-31 (D), but not with Gd-IgA1 (E). \* $p < 0.05$ .
